# Supplementary material for: Prevalence of Toxoplasma gondii infection in animals of the Arabian Peninsula between 2000–2020: A systematic review and meta‐analysis
Source: PubMed Central journal article supplement (PMC9857116; doi:10.1002/vms3.1004), 2022-11-21

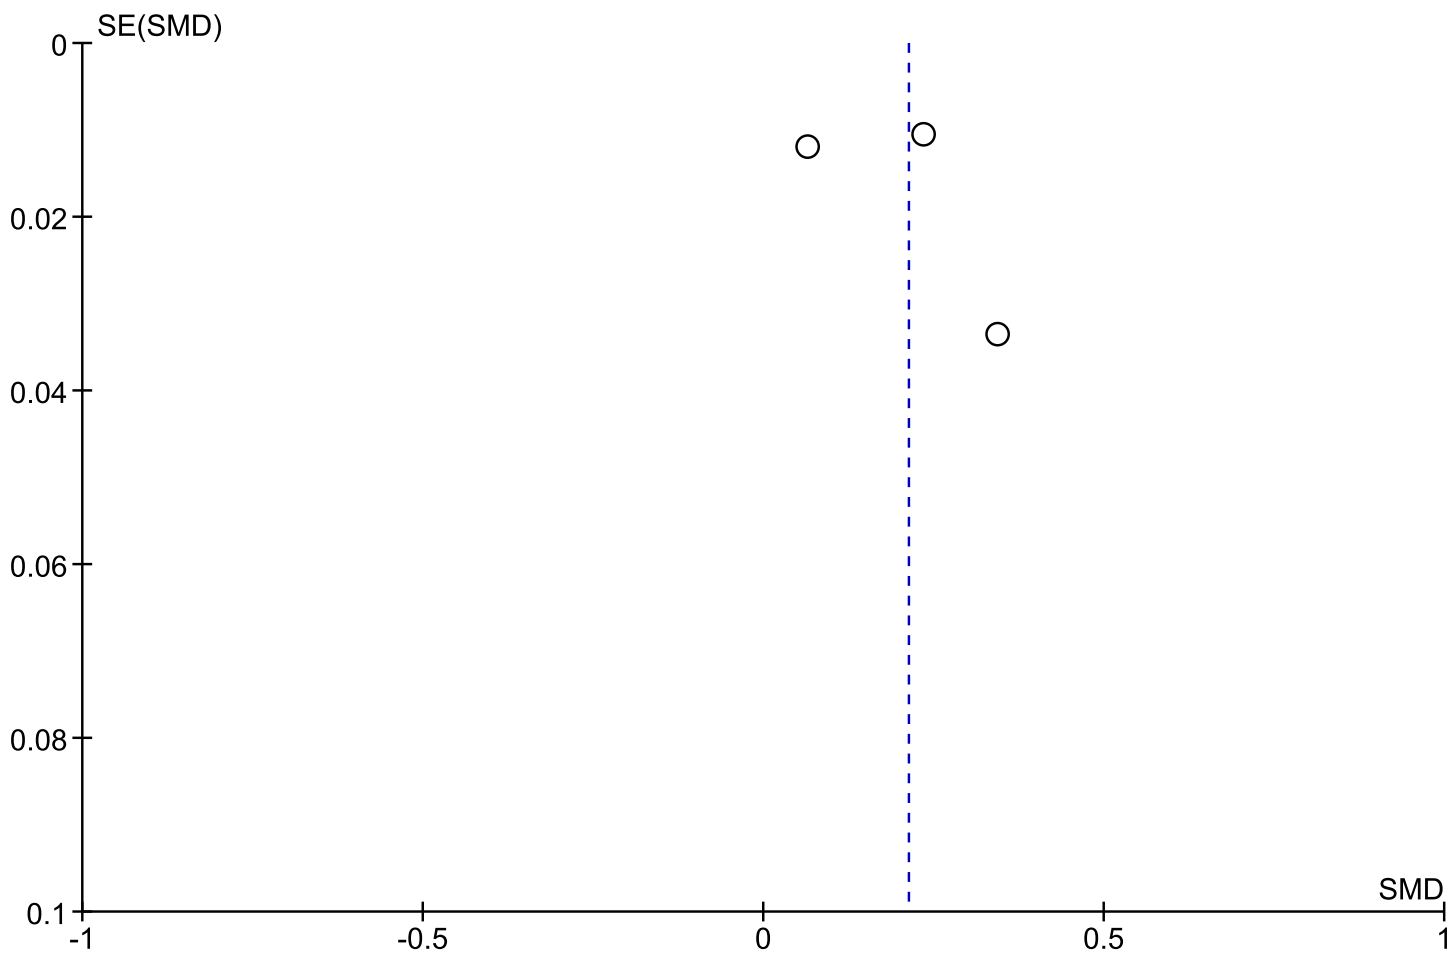

Supplement: VMS3-9-471-s004.pdf [file VMS3-9-471-s004.pdf]
